# Supplementary material for: Analysis of Rare, Exonic Variation amongst Subjects with Autism Spectrum Disorders and Population Controls
Source: PubMed Central journal article supplement (PMC3623759; doi:10.1371/journal.pgen.1003443), 2013-04-11
Supplement: pgen.1003443.s008.pdf [file pgen.1003443.s008.pdf]

Table S1. Comparison of seven individuals called by both Baylor and Broad under different filters.

|       | Filter PASS |            | Filter MISS |            | Filter DpBal |            |
|-------|-------------|------------|-------------|------------|--------------|------------|
| Br/Ba | hom         | het        | hom         | het        | hom          | het        |
| hom   | 335574      | 37         | 296568      | 12 (32%)   | 288877       | 9 (24%)    |
| het   | 96          | 1771       | 49 (51%)    | 1554 (88%) | 42 (43%)     | 1498 (85%) |
|       | Filter B    |            | Filter C    |            | Filter D     |            |
| Br/Ba | hom         | het        | hom         | het        | hom          | het        |
| hom   | 278949      | 6 (16%)    | 269249      | 4 (10%)    | 238325       | 5 (13%)    |
| het   | 33 (34%)    | 1439 (81%) | 32 (33%)    | 1356 (77%) | 26 (27%)     | 1151 (65%) |

Note: Using all the non-synonymous rare variants called both by Baylor and Broad. Filter PASS includes all variants that score a “Pass” based on GATK, Filter MISS: missingness < 10%, Filter DpBal: missingness < 10%,  $\eta > 10$  &  $\xi < 0.85$  for Baylor,  $\eta > 10$  &  $\xi < 0.75$  for Broad; Filter B: Missingness < 10%,  $\eta > 10$  &  $\xi < 0.75$ ; Filter C: Missingness < 10%,  $\eta > 12$  &  $\xi < 0.75$  for Baylor,  $\eta > 17$  &  $\xi < 0.66$  for Broad; Filter D: Missingness < 10%,  $\eta > 10$  &  $\xi < 0.66$ .
