# Supplementary material for: Analysis of Rare, Exonic Variation amongst Subjects with Autism Spectrum Disorders and Population Controls
Source: PubMed Central journal article supplement (PMC3623759; doi:10.1371/journal.pgen.1003443), 2013-04-11
Supplement: pgen.1003443.s009.pdf [file pgen.1003443.s009.pdf]

Table S2: Genomic control  $\lambda$  and  $\lambda_q$  based on different types of PC adjustment

|                    | SKAT   |       |       |        | Burden |       |       |        |
|--------------------|--------|-------|-------|--------|--------|-------|-------|--------|
|                    | no PCA | CVs   | LFVs  | CV+LFV | no PCA | CVs   | LFVs  | CV+LFV |
| Broad $\lambda$    | 1.197  | 1.115 | 1.117 | 1.112  | 1.109  | 1.070 | 1.077 | 1.088  |
| Broad $\lambda_q$  | 1.064  | 1.032 | 1.020 | 1.028  | 1.059  | 1.031 | 1.039 | 1.031  |
| Baylor $\lambda$   | 1.251  | 1.163 | 1.151 | 1.148  | 1.146  | 1.037 | 1.029 | 1.036  |
| Baylor $\lambda_q$ | 1.107  | 1.046 | 1.056 | 1.043  | 1.094  | 1.027 | 1.010 | 1.023  |
| Mega $\lambda$     | 1.298  | 1.188 | 1.166 | 1.187  | 1.195  | 1.107 | 1.112 | 1.112  |
| Mega $\lambda_q$   | 1.176  | 1.078 | 1.081 | 1.072  | 1.151  | 1.047 | 1.068 | 1.069  |
| Meta $\lambda$     | 1.322  | 1.200 | 1.205 | 1.201  | 1.175  | 1.082 | 1.103 | 1.098  |
| Meta $\lambda_q$   | 1.145  | 1.089 | 1.101 | 1.098  | 1.104  | 1.036 | 1.034 | 1.050  |

Note: These analyses are restricted to the genes that have more than 4 minor alleles in the samples used in each study.  $\lambda$  and  $\lambda_q$  are calculated based on the median and the 1st quantile of the p-value distribution, respectively. CVs PC adjustment is based on the common variants eigen-vectors. LFVs PC adjustment is based on the low frequency variants eigen-vectors. CV+LFV PC adjustment is based on the common variants plus low frequency variants eigen-vectors.
