# Supplementary material for: Analysis of Rare, Exonic Variation amongst Subjects with Autism Spectrum Disorders and Population Controls
Source: PubMed Central journal article supplement (PMC3623759; doi:10.1371/journal.pgen.1003443), 2013-04-11
Supplement: pgen.1003443.s013.pdf [file pgen.1003443.s013.pdf]

Table S6: The required sample sizes to have good power by applying meta- and mega-analysis

|            | Power > 0.5 |      | Power > 0.8 |      |
|------------|-------------|------|-------------|------|
|            | Meta        | Mega | Meta        | Mega |
| Scenario A | 3050        | 2360 | 3850        | 3060 |
| Scenario B | 4030        | 3130 | 5090        | 4000 |
| Scenario C | 4450        | 3370 | 5550        | 4260 |

Note: Required sample sizes are calculated based on the theoretical power function of meta- and mega- analysis in Equation S3 and Equation S4. The p-value threshold is  $10^{-5}$ ). Scenario A: the gene has 15 variants, each with  $MAF = .0025$ , for which all have odds ratio of 4. Scenario B: the gene has 20 variants, each with  $MAF = 0.005$ , for which 10 have odds ratio of 3; Scenario C: the gene has 40 variants, each with  $MAF = .005$ , for which 30 have odds ratio of 2.
