# Supplementary material for: Analysis of Rare, Exonic Variation amongst Subjects with Autism Spectrum Disorders and Population Controls
Source: PubMed Central journal article supplement (PMC3623759; doi:10.1371/journal.pgen.1003443), 2013-04-11
Supplement: pgen.1003443.s014.pdf [file pgen.1003443.s014.pdf]

**Table S7. Classification tree results for heterozygote calls.**

| Predicted/Confirmed | Stringent Filter |     | Lenient Filter |     |
|---------------------|------------------|-----|----------------|-----|
|                     | Yes              | No  | Yes            | No  |
| Yes                 | 83               | 45  | 87             | 74  |
| No                  | 4                | 390 | 0              | 361 |

Note: Stringent Filter: missingness < 10%,  $\eta > 17$  &  $\xi < 0.66$ ; Lenient Filter: missingness < 10%,  $\eta > 10$  &  $\xi < 0.75$ .
