# Supplementary material for: Analysis of Rare, Exonic Variation amongst Subjects with Autism Spectrum Disorders and Population Controls
Source: PLoS Genet. 2013 Apr 11;9(4):e1003443. doi: 10.1371/journal.pgen.1003443 (PMC3623759; doi:10.1371/journal.pgen.1003443)
Supplement: Table S3 — Genes with p-value from the SKAT or Burden Test. (XLSX) [file pgen.1003443.s010.xlsx]

## Sheet: megasiggene_p_new2
gene	SKAT Mega P-value	SKAT Baylor P-value	SKAT Broad P-value	Burden Mega P-value	Burden Baylor P-value	Burden Broad P-value	Case MAC	Control MAC
ABHD12	0.013939	0.265874	0.0102707	0.00284201	0.121618	0.00661652	4	11
ACSM3	0.0957462	0.025741	0.264488	0.00780068	0.0251778	0.232215	51	18
ACVR2B	0.0460062	0.0997918	0.223564	0.00163808	0.0142872	0.107395	14	1
AKAP10	0.0221547	0.00664738	0.31053	0.00262053	0.00664738	0.161883	6	12
AKR1D1	0.0364026	0.559206	0.037738	0.00135416	0.559206	0.0084208	4	12
ALDH1L1	0.010864	0.0412868	0.0709835	0.000512516	0.0569971	0.00996938	62	22
ANKFN1	0.027181	0.687765	0.0610689	0.00610406	0.244128	0.000840754	42	15
ANKMY2	0.00164698	0.33905	0.00989632	0.603432	0.165715	0.750118	20	17
ANKRD17	0.0064489	0.342128	0.0754961	0.179931	0.850868	0.240156	30	17
ANKRD37	0.00868132	0.154232	0.145372	0.377451	0.314916	0.769479	16	6
ANKRD55	0.0168295	0.0674305	0.0877189	0.00102991	0.0131468	0.0349404	54	20
APBA1	0.046595	0.0211076	0.395292	0.00609367	0.010762	0.395292	16	3
ARFGAP2	0.0224113	0.39793	0.0259978	0.00920399	0.19129	0.0378757	20	34
ARRB2	0.0100943	0.147705	0.0984702	0.00336464	0.147705	0.0591949	2	9
ASB15	0.00428196	0.0258311	0.0040746	0.610536	0.0105904	0.285692	23	16
ATG16L1	0.00250522	0.151563	0.0189056	0.00492019	0.156286	0.0189056	4	15
BCL2L13	0.00181195	0.275784	0.00571537	0.609976	0.0574318	0.034152	30	27
BSCL2	0.00408032	0.0553326	0.125216	0.0743914	0.183374	0.22341	13	15
C14orf109	0.270134	0.0552957	0.0542264	0.00828575	0.00867666	0.0542264	6	16
C18orf26	0.00630519	0.0319902	0.0139348	0.808604	0.231196	0.995684	21	22
C1orf141	0.0281728	0.0689468	0.449989	0.0012755	0.010686	0.0564996	39	17
C1orf51	0.102957	0.438247	0.0485991	0.00804433	0.279543	0.00571235	24	5
C20orf26	0.00220798	0.0454799	0.0200349	0.0154571	0.148765	0.0236281	61	66
C2orf61	0.00665237	0.0397534	0.25477	0.0302802	0.0397534	0.427798	6	8
C3AR1	0.00939516	0.444267	0.0141717	0.0231908	0.774912	0.00551293	7	11
C6	0.00601352	0.443941	0.00591825	0.100729	0.0267539	0.938003	102	66
C6orf130	0.0164492	0.342757	0.0163489	0.00522124	0.20483	0.00362899	13	2
C7orf47	0.00248832	0.0601852	0.174524	0.0521205	0.0546907	0.174524	13	4
C8orf34	0.105818	0.161686	0.0635544	0.00861747	0.508958	0.00738194	22	6
CABS1	0.0441518	0.614001	0.00041398	0.00961505	0.527609	0.000447755	15	2
CASC4	0.0398727	0.0940363	0.289385	0.00335318	0.0491599	0.166044	6	13
CCDC138	0.0110868	0.11805	0.017601	0.00590147	0.100265	0.0382391	19	3
CCDC60	0.0250929	0.123851	0.139602	0.00414205	0.113728	0.0429508	43	15
CCDC65	0.00828567	0.0325434	0.180368	0.0120967	0.0346377	0.0922884	49	17
CD320	0.00930732	0.0162172	0.420839	0.00482298	0.0145863	0.420839	16	4
CDADC1	0.00368908	0.180621	0.0356268	0.473416	0.227809	0.482436	9	9
CEACAM16	0.00632596	0.0977522	0.102228	0.0158426	0.0407018	0.102228	10	2
CELSR1	0.709478	0.330145	0.965253	0.00810715	0.576898	0.374401	129	96
CENPT	0.0389036	0.0051894	0.335551	0.00135246	0.0234172	0.0781906	37	44
CFHR5	0.0288823	0.0861573	0.240458	0.00176987	0.0249922	0.0257552	72	29
CH25H	0.00655225	0.139494	0.00721022	0.00655225	0.139494	0.00721022	5	0
CHCHD6	0.0284825	0.192383	0.0593584	0.00905644	0.192383	0.0168	10	1
CHRD	0.00871722	0.274265	0.0241519	0.203007	0.274265	0.0421164	11	20
CIAPIN1	0.00371141	0.00162467	0.317294	0.00371141	0.00162467	0.317294	0	6
CIDEB	0.0134499	0.0587845	0.391769	0.00793824	0.0500926	0.22544	7	17
CLDN17	0.00730909	0.0463124	0.252432	0.00231242	0.0095319	0.0912817	8	20
CLEC14A	0.00520107	0.0172383	0.060965	0.0475505	0.145207	0.0881241	9	8
CLSTN2	0.00192293	0.0102556	0.00796519	0.00141303	0.00344251	0.00703139	30	48
CLUL1	0.00573742	0.1529	0.0363324	0.300504	0.496059	0.308874	10	8
COL28A1	0.312984	0.360809	0.347776	0.0083944	0.0239658	0.422336	90	85
CRAT	0.00773462	0.456637	0.273427	0.923657	0.982943	0.039758	31	32
CREB3L4	0.00760435	0.085718	0.0808941	0.17841	0.344544	0.346975	22	17
CSGALNACT1	0.0970695	0.0862592	0.173478	0.00899307	0.235613	0.0104916	31	35
CSN1S1	0.0580889	0.119231	0.138266	0.00520244	0.010751	0.152517	18	2
CSPG4	0.0323125	0.348604	0.471022	0.00952055	0.11814	0.983516	96	46
CYB5D2	0.0235221	0.0549736	0.135621	0.00301193	0.0329564	0.029339	25	6
CYB5RL	0.00129787	0.121817	0.0128252	0.024289	0.297863	0.0643616	10	19
CYP11B2	0.00279643	0.01947	0.353401	0.00551008	0.0361882	0.484737	25	4
CYTH3	0.0550725	0.415966	0.0350826	0.0091951	0.855051	0.0108955	3	9
DCAF13	0.00978249	0.0839575	0.15603	0.0818313	0.128062	0.405837	39	25
DECR2	0.00330417	0.439242	0.00653457	0.000968651	0.537424	0.00164178	12	27
DGKH	0.0037886	0.0957593	0.0682126	0.0127339	0.0518562	0.171272	22	35
DKK1	0.0128231	0.0837015	0.0441065	0.00360488	0.0370902	0.0441065	15	4
DLL1	0.0245977	0.0350016	0.307757	0.00445323	0.0154056	0.153859	18	2
DNA2	0.00214853	0.0832826	0.0598777	0.486237	0.604756	0.942737	52	31
DNAH8	0.00643963	0.347423	0.0526749	0.264132	0.666235	0.296648	172	147
DNASE1L3	0.00448677	0.721215	0.0677072	0.104693	0.274912	0.297524	15	14
DSTYK	0.00518314	0.0632368	0.0951161	0.000878446	0.0263184	0.0307498	29	5
DUSP14	0.00903547	0.0890335	0.0544033	0.0143959	0.0890335	0.066467	9	1
E4F1	0.283235	0.776637	0.419601	0.00588664	0.0897105	0.144858	41	15
EEPD1	0.00770106	0.097821	0.243569	0.0633523	0.20502	0.370274	23	28
EML5	0.00300826	0.17839	0.161229	0.0533402	0.261977	0.307466	25	32
ERAP1	0.00402137	0.0654241	0.0739729	0.0137949	0.180175	0.0357376	27	40
ERICH1	0.00309826	0.075917	0.0782878	0.0294952	0.326294	0.00441861	16	32
ERMP1	0.00452818	0.131663	0.0493228	0.0774667	0.27061	0.266049	40	21
ESRP1	0.0197425	0.128057	0.0903338	0.00101691	0.00947422	0.0551764	8	20
EXOSC1	0.00237038	0.217543	0.00635667	0.00209405	0.185565	0.00635667	1	13
EXTL3	0.0551238	0.24069	0.0559823	0.00884295	0.103742	0.0559823	8	16
EYS	0.00539504	0.125641	0.00438113	0.491326	0.171246	0.00387853	90	91
FAH	0.0464367	0.0533713	0.531726	0.00529024	0.0108142	0.334069	14	2
FAM160B1	0.00760339	0.616069	0.0143573	0.00219255	0.344438	0.00657036	2	10
FAM71D	0.00138872	0.518649	0.0193522	0.00182518	0.518649	0.00549356	4	21
FAM83H	0.00725874	0.0394656	0.42638	0.00698026	0.0294723	0.413431	36	15
FANCE	0.0784129	0.409125	0.0174103	0.00227949	0.19559	0.00133673	7	21
FASTKD1	0.000846721	0.000714427	0.498588	0.0435831	0.121506	0.498588	25	9
FBXL22	0.00942036	0.016281	0.0532995	0.0160325	0.00213376	0.468672	7	21
FBXO4	0.00491542	0.153053	0.0394722	0.0977437	0.114432	0.275354	20	6
FCAR	0.00817237	0.00706627	0.379633	0.00817237	0.00706627	0.379633	9	1
FGB	0.1953	0.392802	0.338485	0.00697646	0.116717	0.110358	19	26
FPGS	0.0450257	0.477859	0.0848597	0.00893446	0.389454	0.0256245	31	16
FZD10	0.0251143	0.0378653	0.0853548	0.0060536	0.108805	0.00324122	11	1
GABRA6	0.0097132	0.0561663	0.104694	0.608392	0.985589	0.951002	35	23
GALNT9	0.00136422	0.0878106	0.0710176	0.00622755	0.0880623	0.0635668	5	12
GCET2	0.00373694	0.0020688	0.119995	0.00166058	0.000228104	0.494066	2	8
GFRA2	0.00649442	0.0493269	0.073307	0.0063508	0.0468696	0.073307	4	11
GK5	0.00469925	0.0401216	0.0901336	0.00469925	0.0401216	0.0901336	1	5
GLRA2	0.0364698	0.312553	0.0534751	0.00582872	0.312553	0.0142544	0	6
GPR101	0.00540606	0.431484	0.00953537	0.328363	0.760435	0.347153	21	21
GPR125	0.0681503	0.0287276	0.984962	0.00563798	0.00612428	0.607147	60	23
GSTK1	0.00576419	0.048941	0.141229	0.15705	0.219612	0.843459	12	15
HAMP	0.00297604	0.138284	0.0456693	0.339032	0.810502	0.377131	12	14
HAS1	0.152073	0.725324	0.492493	0.00836879	0.139956	0.492493	24	4
HIST1H4H	0.000676815	0.00117068	0.0545214	0.000676815	0.00117068	0.0545214	0	5
HLTF	0.00868583	0.5936	0.0171667	0.655299	0.663744	0.684996	42	34
HOXB2	0.00380104	0.0523726	0.051363	0.720013	0.23311	0.639674	17	11
HOXC8	0.00807949	0.381406	7.11513e-06	0.212246	0.381406	7.11513e-06	2	3
HS3ST6	0.00529702	0.00438705	0.205896	0.308371	0.22654	0.0102318	16	16
HYDIN	0.0300314	0.118145	0.529451	0.00186371	0.956451	0.292711	246	214
IFI16	0.00742604	0.406519	0.0044693	0.800712	0.843182	0.600585	66	60
IGFLR1	0.00972028	0.728042	0.0348937	0.826071	0.841534	0.278536	25	27
IMPACT	0.00023932	0.00171621	0.301602	0.00331637	0.000846214	0.125139	5	12
INTS8	0.0322044	0.135428	0.0255566	0.00218577	0.0352741	0.00764233	38	16
IRF3	0.0396323	0.126032	0.137442	0.00932704	0.0377544	0.0634652	13	19
ITGB1BP1	0.000676683	0.770091	0.0451719	0.0574902	0.770091	0.0451719	2	5
ITGB6	0.00746674	0.0339482	0.719865	0.125621	0.656058	0.77133	46	30
KCND1	0.00212938	0.449724	0.0352191	0.169835	0.306298	0.781276	20	31
KCTD13	0.00975929	0.426635	0.00170151	0.00975929	0.426635	0.0225443	1	6
KIAA0415	0.0167075	0.12221	0.481925	0.00297844	0.0171085	0.346284	33	12
KIF3B	0.00378703	0.00410893	0.622088	0.00167414	0.00177065	0.586196	5	16
KRTAP23-1	0.0297126	0.133142	0.606852	0.00934849	0.0515816	0.606852	14	2
KRTAP27-1	0.00804216	0.587543	0.00163697	0.152548	0.692755	0.024181	16	9
LACE1	0.0390167	0.133322	0.218138	0.00249618	0.0504306	0.0778449	16	31
LAMC3	0.0335089	0.078684	0.116331	0.00102764	0.00475137	0.0575054	82	30
LAPTM4B	0.00736836	0.00202543	0.00973997	0.000621797	6.64256e-05	0.0237011	8	17
LMO4	0.0148459	0.0437396	0.531093	0.00982556	0.0322578	0.531093	6	0
LRRFIP2	0.0471184	0.310454	0.0658353	0.00489496	0.317963	0.00638837	15	27
LRRTM1	0.00377932	0.0259627	0.409922	0.439915	0.216714	0.0974647	24	12
LYVE1	0.0423478	0.00495779	0.565263	0.00385781	0.000258146	0.333137	10	16
MCAM	0.0100884	0.0395899	0.312324	0.00222621	0.00940495	0.280685	23	7
MED13L	0.00741051	0.744576	0.00841534	0.451263	0.622809	0.422521	45	35
MED14	0.00641438	0.508083	0.213327	0.693426	0.283831	0.920631	10	9
METTL2A	0.00991341	0.0801068	0.0519093	0.00991341	0.0801068	0.0519093	4	0
MRPL38	0.00307966	0.00570274	0	0.354732	0.0770505	0.722672	22	21
MRTO4	0.0085923	1	0.0118764	0.804155	0.820478	0.00110568	4	9
MTERFD2	0.0573993	0.833658	0.0142422	0.00305465	0.417173	0.000998137	23	5
MTRR	0.00913955	0.598313	0.00318699	0.85416	0.155603	0.102421	46	32
MUC6	0.18922	0.187329	0.425865	0.00164261	0.0727957	0.984571	111	100
MYEOV2	0.0217756	0.019124	0.140547	0.00611182	0.00225969	0.0645179	17	30
MYO1C	0.003951	0.166549	0.0226426	0.665587	0.938045	0.63031	70	59
N4BP3	0.00831168	0.0627557	0.00749301	0.00936542	0.0418776	0.105573	26	10
NBPF3	0.0128382	0.0298881	0.215715	0.000190745	0.00135022	0.215715	33	9
NCAPG	0.0243968	0.118096	0.217872	0.00718446	0.0555914	0.0822839	25	7
NFASC	0.00439826	0.144785	0.00158958	0.131977	0.178527	0.260936	64	77
NMI	0.0333365	0.106591	0.279497	0.00881552	0.0474409	0.126916	17	6
NOC2L	0.0328076	0.070956	0.156453	0.00209636	0.0347664	0.381214	28	10
NPFF	0.0129932	0.0469816	0.0327651	0.00200105	0.0309382	0.00807441	4	12
NPLOC4	0.0186446	0.539829	0.000716323	0.00678391	0.278226	0.000716323	15	5
NRXN3	0.0171302	0.170568	0.018475	0.00227907	0.0760231	0.023051	12	26
NSD1	0.000727893	0.043004	0.00090165	0.0166896	0.0374458	0.0114887	45	15
NUBP1	0.00148916	0.0141291	0.0156701	0.000539235	0.0141291	0.0470168	2	13
NUP37	0.00260536	0.0827129	0.0138218	0.00260536	0.0827129	0.0138218	0	3
NYNRIN	0.00258934	0.397499	0.0121781	0.198512	0.569246	0.0489871	58	33
OBP2A	0.00870872	0.0158268	0.382543	0.0286088	0.126725	0.382543	8	1
OR13H1	0.00448671	0.0799679	0.106911	0.0141763	0.168057	0.135135	12	22
P2RY13	0.000328738	0.00440033	0.0927311	0.000575273	0.00442573	0.137546	19	41
PAWR	0.00663872	0.0429405	0.0370391	0.00149204	0.0120696	0.039281	7	0
PAX5	0.00149779	0.143002	0.00533565	0.153196	0.556354	0.030668	15	20
PCDH7	0.00918496	0.00120268	0.376525	0.916201	0.0765345	0.218452	29	22
PCDHA6	0.00873598	0.0116695	0.313445	0.895259	0.650635	0.313445	17	10
PCDHB12	0.00451745	0.294576	0.0840658	0.00054382	0.0285187	0.0840658	33	8
PCDHB5	0.00777367	0.130249	0.105994	0.102628	0.108655	0.105994	36	16
PCDHGA6	0.00634652	0.0339362	0.662185	0.0100671	0.131276	0.158212	33	14
PDIA2	0.0562313	0.323738	0.0210642	0.0017967	0.033351	0.125454	109	56
PDZRN4	0.116257	0.00404273	0.588191	0.00542858	0.000500158	0.905246	58	26
PF4V1	0.0357879	0.0892787	0.0710686	0.00688687	0.033609	0.0710686	4	8
PIGA	0.0297716	0.153549	0.295459	0.00814601	0.0566849	0.295459	4	0
PIP4K2C	0.081688	0.0291695	0.668462	0.00497451	0.00720709	0.392654	13	18
PLCB3	0.00194532	0.0588646	0.0421093	0.00404054	0.112761	0.0356331	17	34
PNMA5	0.0358479	0.0111853	0.48308	0.00315527	0.00224944	0.159886	27	8
POLR1D	0.00234864	0.74291	0.00696835	0.00421186	0.74291	0.0307145	6	17
PPL	0.0143245	0.00672678	0.296608	0.00410348	0.0039287	0.41245	113	60
PQBP1	0.0407412	0.00638286	0.115143	0.00367749	0.00638286	0.0182983	0	6
PRAM1	0.0412499	0.034036	0.262427	0.00193132	0.034293	0.320847	40	9
PRKD2	0.0462256	0.25556	0.25009	0.00483303	0.0782962	0.372493	31	9
PRPSAP1	0.00551359	0.153893	0.0208359	0.0105392	0.125653	0.0208359	15	6
PRR12	0.00759206	0.00258444	0.15672	0.764727	0.021509	0.283714	25	10
PSD4	0.000473191	0.0171296	0.494123	0.294255	0.0364875	0.5212	48	31
PZP	0.00329569	0.0362501	0.0964731	0.383552	0.417754	0.543712	37	39
RAD50	0.0045452	0.135144	0.0956702	0.178694	0.173472	0.33019	60	35
RANBP6	0.0327172	0.209004	0.0355047	0.00777628	0.0747308	0.189065	36	17
RCOR2	0.00200187	0.00258186	0.548032	0.00104555	0.000912728	0.548032	1	12
RGS18	0.0279999	0.156036	0.152346	0.00728579	0.053228	0.152346	8	1
RGS5	0.0394333	0.702414	0.263637	0.00767622	0.702414	0.0425949	2	11
RIMBP2	0.00701947	0.00116112	0.231286	0.818201	0.0677794	0.171945	35	44
RIN2	0.228702	0.230086	0.950304	0.00973978	0.023227	0.26074	43	16
ROM1	0.00313201	0.0958528	0.0670036	0.0786657	0.431839	0.138633	19	26
RP2	0.0664536	0.23897	0.150252	0.00723252	0.23897	0.0217464	3	11
RSC1A1	0.14151	0.352699	0.753982	0.00430764	0.017087	0.176873	51	18
S1PR4	0.0746086	0.451392	0.820665	0.00565422	0.0544681	0.820665	43	20
SCTR	0.00662616	0.162316	0.0075718	0.278034	0.111161	0.760651	61	40
SEMA5B	0.00167161	0.0197294	0.0978659	0.665243	0.216268	0.812739	30	32
SF3B3	0.00676413	0.136466	0.0156356	0.136318	0.178288	0.249165	16	6
SFTA3	0.00706019	0.408712	0.0203931	0.0352795	0.633295	0.0203931	2	8
SH3GL1	0.00463926	0.0642589	0.0579579	0.00463926	0.0642589	0.0579579	2	8
SHISA5	0.0066529	0.205078	0.11162	0.0973724	0.531378	0.11162	10	3
SIDT2	0.00948492	0.050764	0.0467991	0.537695	0.682391	0.282084	44	31
SLC22A14	0.00884185	0.0970842	0.0500551	0.0402824	0.254766	0.115989	50	26
SLC24A3	0.119447	0.170608	0.435034	0.00234636	0.0349385	0.0496414	52	25
SLC24A6	0.00141419	0.0525579	0.000243584	0.000974895	0.0525579	0.00373582	3	14
SLC2A10	0.229973	0.0255781	0.588316	0.00699327	0.0126139	0.196278	40	7
SLC2A12	0.00213855	0.0548305	0.0287113	0.000494305	0.0164513	0.0287113	3	18
SLC30A4	0.00758097	0.0248889	0.132374	0.0201108	0.0248889	0.132374	2	8
SLC39A2	0.0050042	0.059757	0.0716042	0.000618172	0.100078	0.00329289	27	38
SLC39A8	0.00297737	0.20952	0.0182691	0.000618527	0.0792421	0.00629215	3	13
SLFN11	0.128687	0.133283	0.19177	0.00750273	0.170394	0.19177	36	18
SMARCA2	0.00659918	0.000492169	0.134898	0.162738	0.008287	0.613348	9	11
SNX27	0.000632716	0.0260663	0.0223357	0.0237532	0.0766112	0.0773766	22	7
SPATS1	0.00905308	0.955249	0.0122507	0.00178319	0.955249	0.00308141	5	12
SPG11	0.0057463	0.085314	0.0821334	0.111153	0.0338986	0.715288	87	47
SPP1	0.00272982	0.334641	0.0770179	0.305432	0.909605	0.513003	23	12
STAP1	0.00413365	0.0617546	0.241149	0.021224	0.039742	0.241149	3	8
STK40	0.00435142	0.677991	0.03917	0.503436	0.677991	0.925993	8	4
STON2	0.00339508	0.285379	0.000879699	0.500363	0.437517	0.0252987	49	37
TATDN1	0.0278643	0.0579139	0.302244	0.00766943	0.0167517	0.302244	7	0
TATDN3	0.0475034	0.309732	0.150947	0.0018711	0.0793059	0.0278647	5	15
TBCB	0.0055383	0.786232	0.0271066	0.000647309	0.786232	0.00769989	1	5
TEAD4	0.00928598	0.078962	0.0760147	0.000141806	0.0126563	0.00448914	24	6
TMBIM1	0.383407	0.494578	0.280173	0.00831433	0.362322	0.352166	9	21
TMCO7	0.00577646	0.004281	0.358271	0.425944	0.479372	0.609833	43	34
TMEM132B	0.0541296	0.0517733	0.407368	0.00883996	0.0379834	0.173403	32	10
TMEM143	0.0745049	0.137592	0.322308	0.00735963	0.0182805	0.0965433	17	29
TMEM184B	0.002492	0.0377171	0.17472	0.0621058	0.446699	0.130795	19	8
TMEM87A	0.00744296	0.0412753	0.177397	0.0257214	0.0112923	0.262869	14	4
TNFRSF10A	0.00318021	0.126047	0.00299273	0.0138128	0.767433	0.00449074	14	17
TNFSF8	0.00513538	0.400501	0.0106421	0.0188468	0.603825	0.0106421	1	5
TOLLIP	0.00975706	0.0180829	0.23381	0.00975706	0.0180829	0.23381	2	5
TPTE	0.00066841	0.0153429	0.071371	0.104786	0.0109593	0.0603257	21	11
TRIM26	0.00631546	0.127663	0.253105	0.0499384	0.2619	0.317506	24	7
TRPM8	0.0293058	0.728575	0.0138101	0.00568241	0.524181	0.00293339	35	17
UBAC1	0.0193947	0.0121493	0.521501	0.00315028	0.0157841	0.149519	38	16
UBQLNL	0.0346716	0.150695	0.169067	0.0036476	0.0631896	0.0100498	81	27
UGGT1	0.000385456	4.19363e-05	0.109815	0.0262985	0.00540874	0.651178	29	29
UPK1B	0.00501663	0.0003601	0.538892	0.315704	0.217134	0.971705	22	19
USP24	0.0015792	0.175546	0.00762117	0.0392399	0.639627	0.016414	37	43
USP26	0.0123638	0.377232	0.0569869	0.00312335	0.122565	0.0596735	28	47
USP31	0.00439641	0.154428	0.0400901	0.388314	0.694645	0.25166	41	34
VPS13B	0.000985171	0.0461864	0.438637	0.568757	0.16159	0.485254	220	155
VPS33A	0.00139601	0.00818326	0.454937	0.077216	0.067064	0.681458	14	14
VSTM2L	0.00394283	0.688728	0.0105011	0.702705	0.463144	0.0105011	11	13
WISP1	0.00179155	0.0526198	0.50491	0.0196633	0.0527728	0.581798	14	6
WNK3	0.00707918	0.295218	0.0236555	0.00365525	0.135182	0.00781276	25	5
ZADH2	0.0204813	0.957337	0.0376141	0.00768868	0.957337	0.0296164	3	9
ZDBF2	0.00256552	0.0951211	0.218098	0.0191219	0.108121	0.72871	104	58
ZDHHC20	0.0448833	0.0451796	0.161929	0.00511678	0.0234457	0.0927565	14	5
ZFAND1	0.0140604	0.138107	0.129178	0.00562619	0.0762278	0.129178	10	3
ZFP106	0.000711345	0.0260571	0.0328351	0.432079	0.936898	0.182709	65	41
ZMAT4	0.00856223	0.000827874	0.391979	0.00856223	0.000827874	0.391979	0	3
ZNF202	0.00654004	0.244052	0.0271706	0.00360035	0.23853	0.018787	17	30
ZNF434	0.00933008	0.070958	0.0925201	0.0883771	0.383878	0.167079	22	24
ZNF461	0.00539057	0.0577199	0.0102173	0.366946	0.0679976	0.422162	9	8
ZNF470	0.000603097	0.262342	0.000144697	0.00730307	0.50279	0.00583173	42	15
ZNF544	0.0180565	0.0998611	0.0467683	0.0014036	0.035904	0.460237	54	64
ZNF721	0.00209374	0.0491759	0.0192379	0.00801927	0.0218723	0.84987	60	25
ZNF770	0.00648834	0.0776631	0.0193483	0.00491232	0.047568	0.0193483	13	2
