# Supplementary material for: Analysis of Rare, Exonic Variation amongst Subjects with Autism Spectrum Disorders and Population Controls
Source: PLoS Genet. 2013 Apr 11;9(4):e1003443. doi: 10.1371/journal.pgen.1003443 (PMC3623759; doi:10.1371/journal.pgen.1003443)
Supplement: Table S5 — The p-values of 114 ASD genes. (XLSX) [file pgen.1003443.s012.xlsx]

## Sheet: asd114gene_p_new2
gene	SKAT Mega P-value	SKAT Baylor P-value	SKAT Broad P-value	Burden Mega P-value	Burden Baylor P-value	Burden Broad P-value
ACSL4	0.0261194	0.384237	0.0629496	0.0261194	0.384237	0.0629496
ADSL	0.342284	0.0217894	0.559592	0.261468	0.0128944	0.560704
AFF2	0.511445	0.232685	0.524136	0.447315	0.324162	0.754295
AGTR2	0.516069	0.569571	0.309845	0.762501	0.235255	0.177475
AHI1	0.0192739	0.0302583	0.190606	0.766169	0.841635	0.888448
ALDH5A1	0.0919143	0.0968993	0.558976	0.0495766	0.0374633	0.580092
ALDH7A1	0.631666	0.181281	0.872304	0.559088	0.779612	0.7222
AP1S2	NA	NA	NA	NA	NA	NA
ARHGEF6	0.579297	0.781686	0.813858	0.804767	0.921979	0.58549
ARX	NA	NA	NA	NA	NA	NA
ATRX	0.737781	0.793825	0.429624	0.71934	0.973955	0.697185
BBS10	0.904063	0.766609	0.712316	0.736579	0.772384	0.343168
BRAF	0.207651	0.367887	0.557214	0.207651	0.367887	0.557214
BTD	0.632021	0.276302	0.0655275	0.395528	0.604692	0.108355
CACNA1C	0.45987	0.751243	0.397635	0.530381	0.60951	0.542393
CACNA1F	0.757533	0.41661	0.453677	0.260654	0.804815	0.865955
CASK	0.519586	0.193691	0.0834594	0.519586	0.193691	0.0834594
CDKL5	0.465525	0.80666	0.482637	0.935936	0.751901	0.623923
CEP290	0.0423929	0.179425	0.114049	0.0640851	0.468241	0.00974789
CHD7	0.0290649	0.00391777	0.894199	0.0501891	0.00689189	0.973632
CNTNAP2	0.643319	0.416072	0.0982941	0.287965	0.448712	0.0186558
CREBBP	0.343069	0.391615	0.226556	0.550662	0.320653	0.0273334
DCX	0.37889	0.78365	0.478873	0.858952	0.596005	0.967886
DHCR7	0.0639792	0.28431	0.383743	0.895921	0.603572	0.721873
DMD	0.148694	0.0909599	0.046136	0.0548032	0.926652	0.0520695
DMPK	0.884967	0.399077	0.215258	0.45357	0.399077	0.255188
DPYD	0.496772	0.917258	0.498869	0.241054	0.553985	0.891373
EHMT1	0.849937	0.783777	0.699262	0.799796	0.464677	0.27728
FGD1	0.775994	0.697115	0.433117	0.440293	0.873531	0.252591
FGFR2	0.285502	0.401428	0.152764	0.972556	0.0920674	0.336677
FMR1	0.127161	0.450492	0.111467	0.459607	0.291932	0.0670876
FOLR1	NA	0.238072	NA	NA	0.831494	NA
FOXG1	0.431019	0.22196	0.310419	0.262661	0.22196	0.586292
FOXP1	0.467482	0.322979	0.303687	0.898334	0.243319	0.18881
FTSJ1	NA	NA	0.228785	NA	NA	0.409962
GAMT	0.28021	0.21699	0.932572	0.342707	0.269204	0.932572
GATM	0.431557	0.966987	0.139028	0.288867	0.946266	0.139028
GNS	0.133786	0.798282	0.0278608	0.0859088	0.532067	0.0278608
GRIA3	0.220662	0.330354	0.0353386	0.0880044	0.330354	0.0462291
GRIN2B	0.410967	0.0451853	0.576396	0.232174	0.0451853	0.913683
GUCY2D	0.323317	0.395188	0.479261	0.633733	0.891627	0.989744
HEPACAM	0.367415	0.719595	0.159898	0.137913	0.719595	0.0589477
HGSNAT	0.0379085	0.278511	0.0281016	0.90577	0.894639	0.769894
HOXA1	0.109405	0.232939	0.134508	0.109405	0.232939	0.134508
HRAS	NA	0.628485	NA	NA	0.628485	NA
IGF2	0.818066	0.284918	0.531837	0.732405	0.345232	0.53928
IL1RAPL1	0.449721	0.043297	0.699581	0.225678	0.483205	0.150487
IQSEC2	0.756523	0.396671	0.84142	0.950327	0.396671	0.876702
JARID1C	NA	NA	NA	NA	NA	NA
KCNJ11	0.0888754	0.346019	0.0105596	0.231863	0.329741	0.0105596
KIAA2022	0.350827	0.358187	0.55206	0.71287	0.484261	0.175901
KRAS	NA	NA	0.11187	NA	NA	0.11187
L1CAM	0.419094	0.342429	0.65816	0.669813	0.48282	0.323716
L2HGDH	0.520484	1	0.134621	0.539931	0.774089	0.314138
LAMP2	0.202679	0.408836	0.360364	0.926203	0.124564	0.607385
MAP2K1	NA	0.533274	NA	NA	0.533274	NA
MBD5	0.736874	0.775113	0.660179	0.176729	0.426361	0.362039
MECP2	0.834116	0.696584	0.74734	0.991288	0.31539	0.329182
MED12	0.193722	0.579433	0.594373	0.180804	0.335411	0.418794
MEF2C	0.98395	0.230734	0.644466	0.98395	0.230734	0.644466
MID1	0.627333	0.581767	0.429936	0.877081	0.581767	0.948363
MKKS	0.996543	0.656316	0.917313	0.963977	0.378943	0.478742
NAGLU	0.997449	0.0904814	0.310899	0.707079	0.115676	0.250973
NDP	NA	0.0777514	NA	NA	0.0777514	NA
NF1	0.6577	0.874509	0.704495	0.72005	0.815815	0.766135
NFIX	0.694987	0.903442	0.778118	0.694987	0.903442	0.778118
NHS	0.565732	0.652517	0.7849	0.165547	0.409165	0.14724
NIPBL	0.352539	0.882404	0.14982	0.0545764	0.793111	0.0607632
NLGN3	0.49436	0.00802249	0.188986	0.962214	0.00802249	0.0358253
NLGN4X	0.375682	0.389719	0.672613	0.375682	0.389719	0.672613
NPHP1	0.728447	0.289211	0.946546	0.343225	0.417655	0.432241
NRXN1	0.643569	0.400142	0.365376	0.38502	0.551704	0.20201
NSD1	0.000727893	0.043004	0.00090165	0.0166896	0.0374458	0.0114887
OCRL	0.902029	0.934779	0.90696	0.497091	0.934779	0.670548
OPHN1	0.672434	0.602622	0.437378	0.640484	0.326159	0.825822
OTC	0.133017	0.149873	0.284682	0.338316	0.149873	0.380408
PAFAH1B1	0.277635	0.402145	0.572054	0.277635	0.402145	0.572054
PAH	0.361207	0.359848	0.586466	0.450894	0.663272	0.787069
PCDH19	0.989737	0.707038	0.87627	0.892296	0.239413	0.417614
PHF6	NA	0.112096	NA	NA	0.112096	NA
PHF8	0.826882	0.5707	0.971204	0.965607	0.938305	0.994708
POMGNT1	0.674381	0.807459	0.867772	0.384432	0.939931	0.444391
POMT1	0.164631	1	0.137673	0.894216	0.882359	0.62511
PQBP1	0.0407412	0.00638286	0.115143	0.00367749	0.00638286	0.0182983
PRSS12	0.564266	0.406639	0.130112	0.282745	0.74778	0.103102
PTCHD1	0.27623	0.0854117	0.310541	0.728254	0.0854117	0.716129
PTEN	0.0735535	0.0582995	0.185901	0.0735535	0.0582995	0.185901
PTPN11	0.0907776	0.0494262	0.592859	0.738908	0.953692	0.592859
RAB39B	0.351745	0.509015	0.34256	0.668642	0.509015	0.761064
RAI1	0.709824	0.756084	0.881546	0.568834	0.647196	0.72056
RNF135	0.623206	0.666957	0.650816	0.286209	0.742743	0.300256
RPE65	0.878131	0.846699	0.370968	0.850683	0.600695	0.343855
RPGRIP1L	0.701555	0.981839	0.260938	0.203464	0.623988	0.65069
SATB2	0.758283	0.577089	0.698282	0.758283	0.577089	0.698282
SCN1A	0.143998	0.522925	0.803306	0.868403	0.787021	0.865348
SCN2A	0.978871	0.382235	0.340934	0.892052	0.167885	0.217197
SGSH	0.464087	0.363209	0.428603	0.371024	0.34557	0.897205
SHANK2	0.0710082	0.0301818	0.202524	0.376324	0.278814	0.299636
SHANK3	0.178426	0.238806	0.626444	0.293518	0.470953	0.626444
SLC6A8	NA	0.32356	NA	NA	0.0863692	NA
SLC9A6	0.99375	0.666651	0.93648	0.847887	0.774282	0.875567
SMC1A	0.243223	0.307093	0.517871	0.579256	0.307093	0.758305
STXBP1	0.502058	0.435969	0.118316	0.114186	0.582939	0.0189933
SYN1	0.964005	0.299775	0.0600271	0.964005	0.299775	0.0600271
SYNGAP1	0.497455	0.755754	0.582541	0.364451	0.738289	0.306997
TBX1	0.910296	0.609399	0.645695	0.910296	0.609399	0.645695
TSC1	0.47089	0.061452	0.191312	0.25764	0.697957	0.0705919
TSC2	0.50393	0.591351	0.625569	0.0438941	0.881781	0.0932328
UBE3A	0.649482	0.979996	0.91297	0.649482	0.979996	0.91297
UPF3B	0.428731	0.981014	0.373344	0.891349	0.981014	0.801839
VPS13B	0.000985171	0.0461864	0.438637	0.568757	0.16159	0.485254
YWHAE	NA	0.267613	NA	NA	0.267613	NA
ZNF674	0.914189	0.470754	0.301829	0.74114	0.470754	0.288074
ZNF81	0.354402	0.499064	0.565345	0.46204	0.992265	0.96189
